# Supplementary material for: Psychosocial Processes in Healthcare Workers: How Individuals’ Perceptions of Interpersonal Communication Is Related to Patient Safety Threats and Higher-Quality Care
Source: MDPI journal article supplement (doi:10.3390/ijerph20095698), 2023-05-01
Supplement: s1 [file s1]

# Psychosocial Processes in Healthcare Workers: How Individuals' Perceptions of Interpersonal Communication Is Related to Patient Safety Threats and Higher-Quality Care

## Supplementary Tables with translated measures (used items were worded in German)

**Table S1: Measurement of Psychological safety**

| Scale Introduction                                                                                 | Item                                                                                   |
|----------------------------------------------------------------------------------------------------|----------------------------------------------------------------------------------------|
| Please think more in detail about your team:<br>How much do the following statements apply to you? | Working with members of my team, my unique skills and talents are valued and utilized. |
|                                                                                                    | Members of my team are able to bring up problems and tough issues.                     |
|                                                                                                    | No one on my team would deliberately act in a way that undermines my efforts.          |
|                                                                                                    | It is difficult to ask other members of my team for help.                              |

*Note.* All items were measured with a six-point Likert scale with the answer options '1' (*not at all*) ranging to '6' (*absolutely*). Adapted scale by Edmondson, A. C. (1999). Psychological safety and learning behavior in work teams. *Administrative Science Quarterly*, 44(2), 350–383.

**Psychosocial Processes in Healthcare Workers: How Individuals' Perceptions of Interpersonal Communication Is Related to Patient Safety Threats and Higher-Quality Care**

**Table S2: Measurement of interpersonal communication competencies (study 1: online survey)**

| Scale Introduction | Item                                                                                                               |
|--------------------|--------------------------------------------------------------------------------------------------------------------|
|                    | I answer all patient's questions sufficiently.                                                                     |
|                    | When I explain the treatment or procedure, I am sure that my explanations are completely correct.                  |
|                    | I explain all examinations or procedures in such way that my patients understand them.                             |
|                    | I also involve the persons accompanying the patients or the patients themselves, into the decision-making process. |
|                    | I take concerns and fears seriously.                                                                               |
|                    | I consider how much prior knowledge a patient has and how much he can understand.                                  |
|                    | In my day-to-day work I can deal well with language barriers on the part of patients and accompanying persons.     |
|                    | In general, I am satisfied with my level of communication.                                                         |

*Note.* All items were measured with a six-point Likert scale with the answer options '1' (*not at all*) ranging to '6' (*absolutely*). Newly devised scale based on Rider, E. A., & Keefer, C. H. (2006).

Communication skills competencies: Definitions and a teaching toolbox. *Medical Education*, 40(7), 624–629. <https://doi.org/10.1111/j.1365-2929.2006.02500.x>

# **Psychosocial Processes in Healthcare Workers: How Individuals' Perceptions of Interpersonal Communication Is Related to Patient Safety Threats and Higher-Quality Care**

**Table S3: Measurement of interpersonal communication competencies (study 2: hospital survey)**

| Scale Introduction                                                                                                                                                         | Item                                                                                                             |
|----------------------------------------------------------------------------------------------------------------------------------------------------------------------------|------------------------------------------------------------------------------------------------------------------|
| <p><b>We as a team ...</b></p> <p><i>“We” means you and your colleagues, i.e., those with whom you normally work in a team (not just your own professional group).</i></p> | ...answer all patients' questions sufficiently.                                                                  |
|                                                                                                                                                                            | ... explain treatments or procedures, in such a way that we are sure that the explanation is completely correct. |
|                                                                                                                                                                            | ... explain all examinations or procedures in such a way that the patients understand them.                      |
|                                                                                                                                                                            | ... also involve the people accompanying the patients in decisions.                                              |
|                                                                                                                                                                            | ... listen to the patients' concerns and fears.                                                                  |
|                                                                                                                                                                            | ... consider how much prior knowledge a patient has and how much they can understand.                            |
|                                                                                                                                                                            | ... can deal well with language barriers on the part of patients and accompanying persons in our everyday work.  |

*Note.* All items were measured with a six-point Likert scale with the answer options ‘1’ (*not at all*) ranging to ‘6’ (*absolutely*). Newly devised scale based on Rider, E. A., & Keefer, C. H. (2006). Communication skills competencies: Definitions and a teaching toolbox. *Medical Education*, 40(7), 624–629. <https://doi.org/10.1111/j.1365-2929.2006.02500.x>

# **Psychosocial Processes in Healthcare Workers: How Individuals' Perceptions of Interpersonal Communication Is Related to Patient Safety Threats and Higher-Quality Care**

**Table S4: Measurement of patient safety threats**

| Scale Introduction                            | Item                                                                                                                |
|-----------------------------------------------|---------------------------------------------------------------------------------------------------------------------|
| On a usual workday, I usually notice that ... | ... colleagues have poorly washed or disinfected their hands.                                                       |
|                                               | ... there were conflicts among colleagues.                                                                          |
|                                               | ... patients were poorly informed about examinations or treatment procedures.                                       |
|                                               | ... general applicable due diligence obligations were violated.                                                     |
|                                               | ... colleagues have forgotten to disclose important information.                                                    |
|                                               | ... my opinions and suggestions were ignored.                                                                       |
|                                               | ... important information (e.g., about allergies) was missing from a patient's record.                              |
|                                               | ... processes did not work smoothly.                                                                                |
|                                               | ... colleagues or I were emotionally burdened.                                                                      |
|                                               | ... colleagues or I had insufficient knowledge of technical equipment.                                              |
|                                               | ... colleagues or I were inadequately prepared for discussions with patients.                                       |
|                                               | ... not sufficiently important or useful treatment options (e.g., medication, physiotherapy, etc.) were considered. |
|                                               | ... important information was missing from patients' discharge reports.                                             |
|                                               | ... the cooperation between the hospital and external treatment providers did not work properly.                    |
|                                               | ... conflicts have arisen due to language barriers.                                                                 |

*Note.* All items were measured with a six-point Likert scale with the answer options '1' (*not at all*) ranging to '6' (*absolutely*). Adapted scale by Keller, F. M., Derksen, C., Kötting, L., Schmiedhofer, M., & Lippke, S. (2021). Development of the perceptions of preventable adverse events assessment tool (PPAEAT): measurement properties and patients' mental health status. *International Journal for Quality in Health Care*, 33(2)

# **Psychosocial Processes in Healthcare Workers: How Individuals' Perceptions of Interpersonal Communication Is Related to Patient Safety Threats and Higher-Quality Care**

**Table S5: Measurement of quality of care (study 1: online survey)**

| Scale Introduction                                                                            | Item                                                                                                                |
|-----------------------------------------------------------------------------------------------|---------------------------------------------------------------------------------------------------------------------|
| Please rate below how you perceive your daily work routine based on the given answer options. | Communication and coordination between the various professional groups work well.                                   |
|                                                                                               | It is always possible for me to get current information about patients' health status, treatments, or test results. |
|                                                                                               | I am informed about admission, transfer, and discharge of patients in a timely manner.                              |
|                                                                                               | Patients and their accompanying persons are treated with attention and consideration.                               |
|                                                                                               | The areas where I work, most often with female patients, are occasionally dirty or in need of cleaning.             |
|                                                                                               | I have the opportunity to take advantage of interesting and current professional development opportunities.         |
|                                                                                               | My working schedule takes individual wishes into account.                                                           |
|                                                                                               | Trainees or new employees have a designated contact person.                                                         |
|                                                                                               | I consider that mistakes and complaints are dealt with in a responsible manner in our hospital.                     |
|                                                                                               | My working schedule is burdening.                                                                                   |
|                                                                                               | Confusion often arises as to who is responsible for which patient.                                                  |
|                                                                                               | In my field of work, tasks are clearly defined.                                                                     |

*Note.* All items were measured with a six-point Likert scale with the answer options '1' (*not at all*) ranging to '6' (*absolutely*). Newly devised scale based on Ibn El Haj, H.; Lamrini, M.; Rais, N. Quality of care between Donabedian model and ISO9001V2008. *Int. J. Qual. Res.* 2013, 7(1), 17–30. Klein, J., Grosse Frie, K., Blum, K., & von dem Knesebeck, O. (2011). Psychosocial stress at work and perceived quality of care among clinicians in surgery. *BMC Health Services Research*, 11, 109. <https://doi.org/10.1186/1472-6963-11-109>. Winkler, H., & Prinz, A. (2009). Zertifizierung von Einrichtungen der Sucht-Rehabilitation–Erwartungen und Erfolge [Certification of addiction rehabilitation facilities–expectations and successes]. *SUCHT*, 55(3), 164–168. <https://doi.org/10.1024/2009.03.05>

# **Psychosocial Processes in Healthcare Workers: How Individuals' Perceptions of Interpersonal Communication Is Related to Patient Safety Threats and Higher-Quality Care**

**Table S6: Measurement of quality of care (study 2: hospital survey; short scale)**

| Scale Introduction                                                                            | Item                                                                                                                |
|-----------------------------------------------------------------------------------------------|---------------------------------------------------------------------------------------------------------------------|
| Please rate below how you perceive your daily work routine based on the given answer options. | Communication and coordination between the various professional groups work well.                                   |
|                                                                                               | It is always possible for me to get current information about patients' health status, treatments, or test results. |
|                                                                                               | I am informed about admission, transfer, and discharge of patients in a timely manner.                              |
|                                                                                               | Patients and their accompanying persons are treated with attention and consideration.                               |
|                                                                                               | The areas where I work, most often with female patients, are occasionally dirty or in need of cleaning.             |
|                                                                                               | I have the opportunity to take advantage of interesting and current professional development opportunities.         |
|                                                                                               | My working schedule takes individual wishes into account.                                                           |
|                                                                                               | Trainees or new employees have a designated contact person.                                                         |

*Note.* All items were measured with a six-point Likert scale with the answer options ‘1’ (*not at all*) ranging to ‘6’ (*absolutely*). Newly devised scale based on Hall, W., Violato, C., Lewkonja, R., Lockyer, J., Fidler, H., Toews, J., & Moores, D. (1999). *Assessment of physician performance in Alberta: The physician achievement review*. *Cmaj*, 1(161), 52–57. Klein, J., Grosse Frie, K., Blum, K., & von dem Knesebeck, O. (2011). Psychosocial stress at work and perceived quality of care among clinicians in surgery. *BMC Health Services Research*, 11, 109. <https://doi.org/10.1186/1472-6963-11-109>. Winkler, H., & Prinz, A. (2009). Zertifizierung von Einrichtungen der Sucht-Rehabilitation–Erwartungen und Erfolge [Certification of addiction rehabilitation facilities–expectations and successes]. *SUCHT*, 55(3), 164–168. <https://doi.org/10.1024/2009.03.05>
